# Supplementary material for: [18F]GE-180-PET and Post Mortem Marker Characteristics of Long-Term High-Fat-Diet-Induced Chronic Neuroinflammation in Mice
Source: MDPI journal article supplement (doi:10.3390/biom13050769), 2023-04-28
Supplement: s1 [file s1]

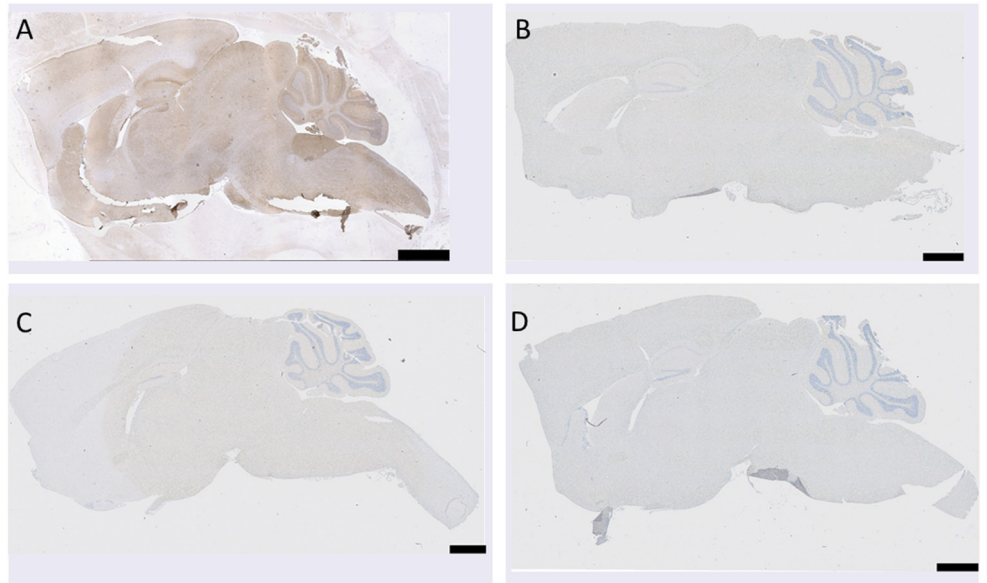

**Figure S1.** Corresponding negative controls of the immunohistochemical reactions of A) TSPO, B) Iba1, C) TMEM119 and D) GFAP. Scale bar representing 1000  $\mu\text{m}$ .

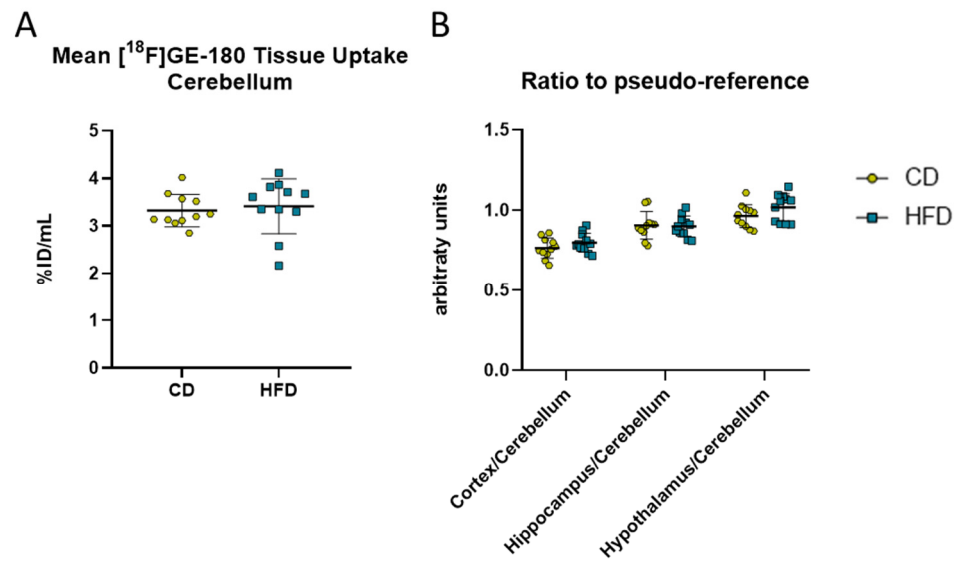

**Figure S2.** [ $^{18}\text{F}$ ]GE-180 PET imaging. A) Comparison of mean uptake [%ID/mL] cerebellum of control diet (CD, yellow,  $n=12$ ) or high-fat diet (HFD, blue,  $n=12$ ). Statistical analysis was performed by unpaired student-t test. B) Ratios of cortex, hippocampus and hypothalamus to cerebellum as pseudo-reference region in CD ( $n=12$ ) or HFD ( $n=12$ ). Statistical analysis was performed by repeated measures ANOVA followed by post-hoc tests with Sidak's correction for multiple comparisons.
